# Supplementary material
Source: Springer Nature journal article supplement (https://www.springermedizin.de/resource/supplementary/13063_2012_1291_MOESM2_ESM.pdf/9619798)
Supplement: MOESM2 [file 9619798]

**Visit 1**  
Spirometry  
MVIC  
1 hour rest  
DET

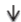

48 hours

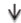

Blood Collection

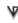

LED

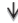

SIC

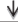

Blood Collection

Randomization

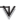

Placebo

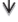

SIC

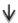

Blood Collection

**Visit 2-3**

1 week

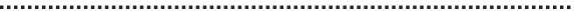

Blood Collection

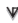

LED

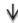

DET

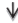

Blood Collection

Randomization

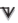

Placebo

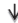

DET

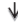

Blood Collection

**Visit 4 - 5**

1 week
